# Supplementary material
Source: PubMed Central journal article supplement (PMC8917083)
Supplement: NIHMS1774806-supplement-2.pdf [file NIHMS1774806-supplement-2.pdf]

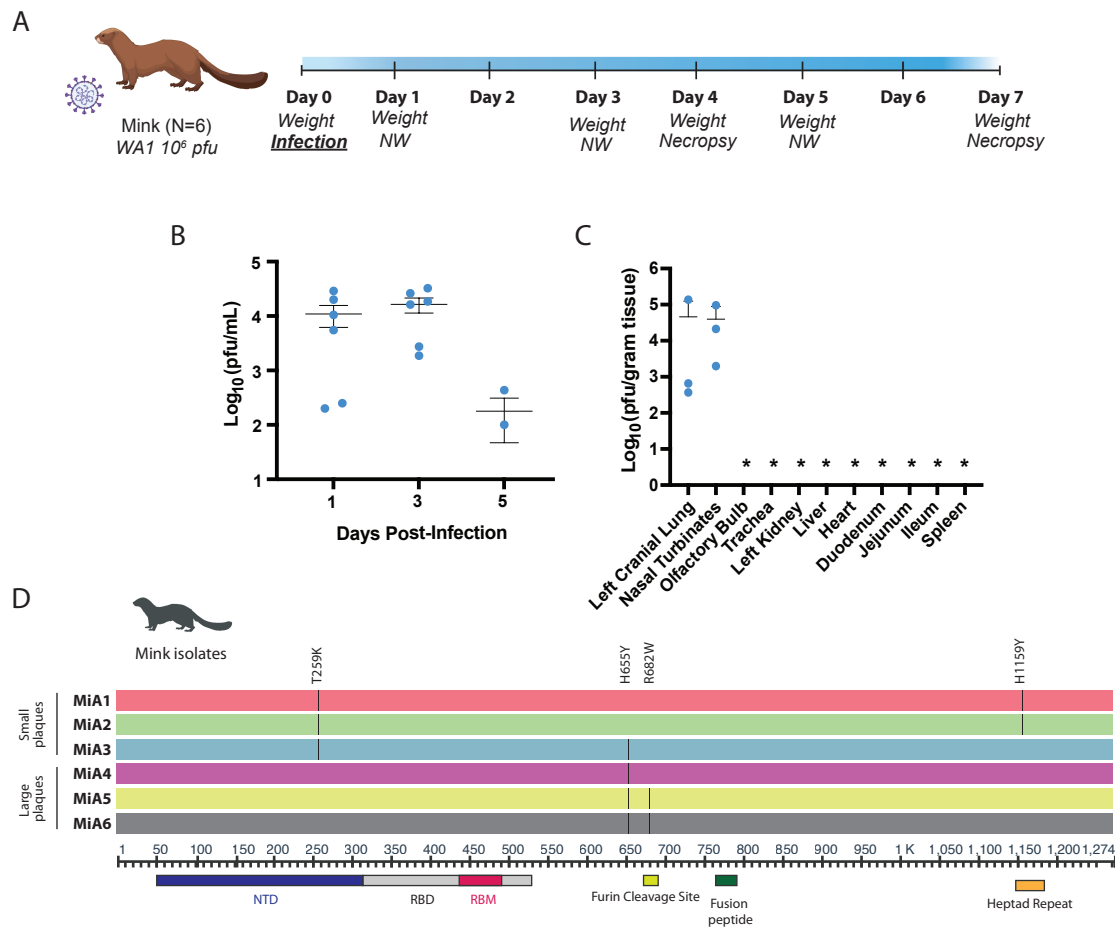

**Supplementary Figure 1 related to Methods and Figure 2. Spike polymorphism H655Y is selected after SARS-CoV-2 replication in mink in vivo model. A)** Mink study design: six minks were infected with  $10^6$  pfu of SARS-CoV-2 WA1 isolate. Nasal washes were collected at day 1, 3 and 5 post-infection (p.i.) and organs were harvested at day 3 and 7 p.i. **B)** Viral titers of nasal washes expressed as PFU per milliliter. **C)** Organ viral titers expressed as pfu per gram of tissue. **D)** Multiple sequence alignment of the spike (S) protein from SARS-CoV-2 viruses isolated after infection in minks with WA1 isolate. Diagram shows the corresponding S amino acid substitutions mapped to the S gene.

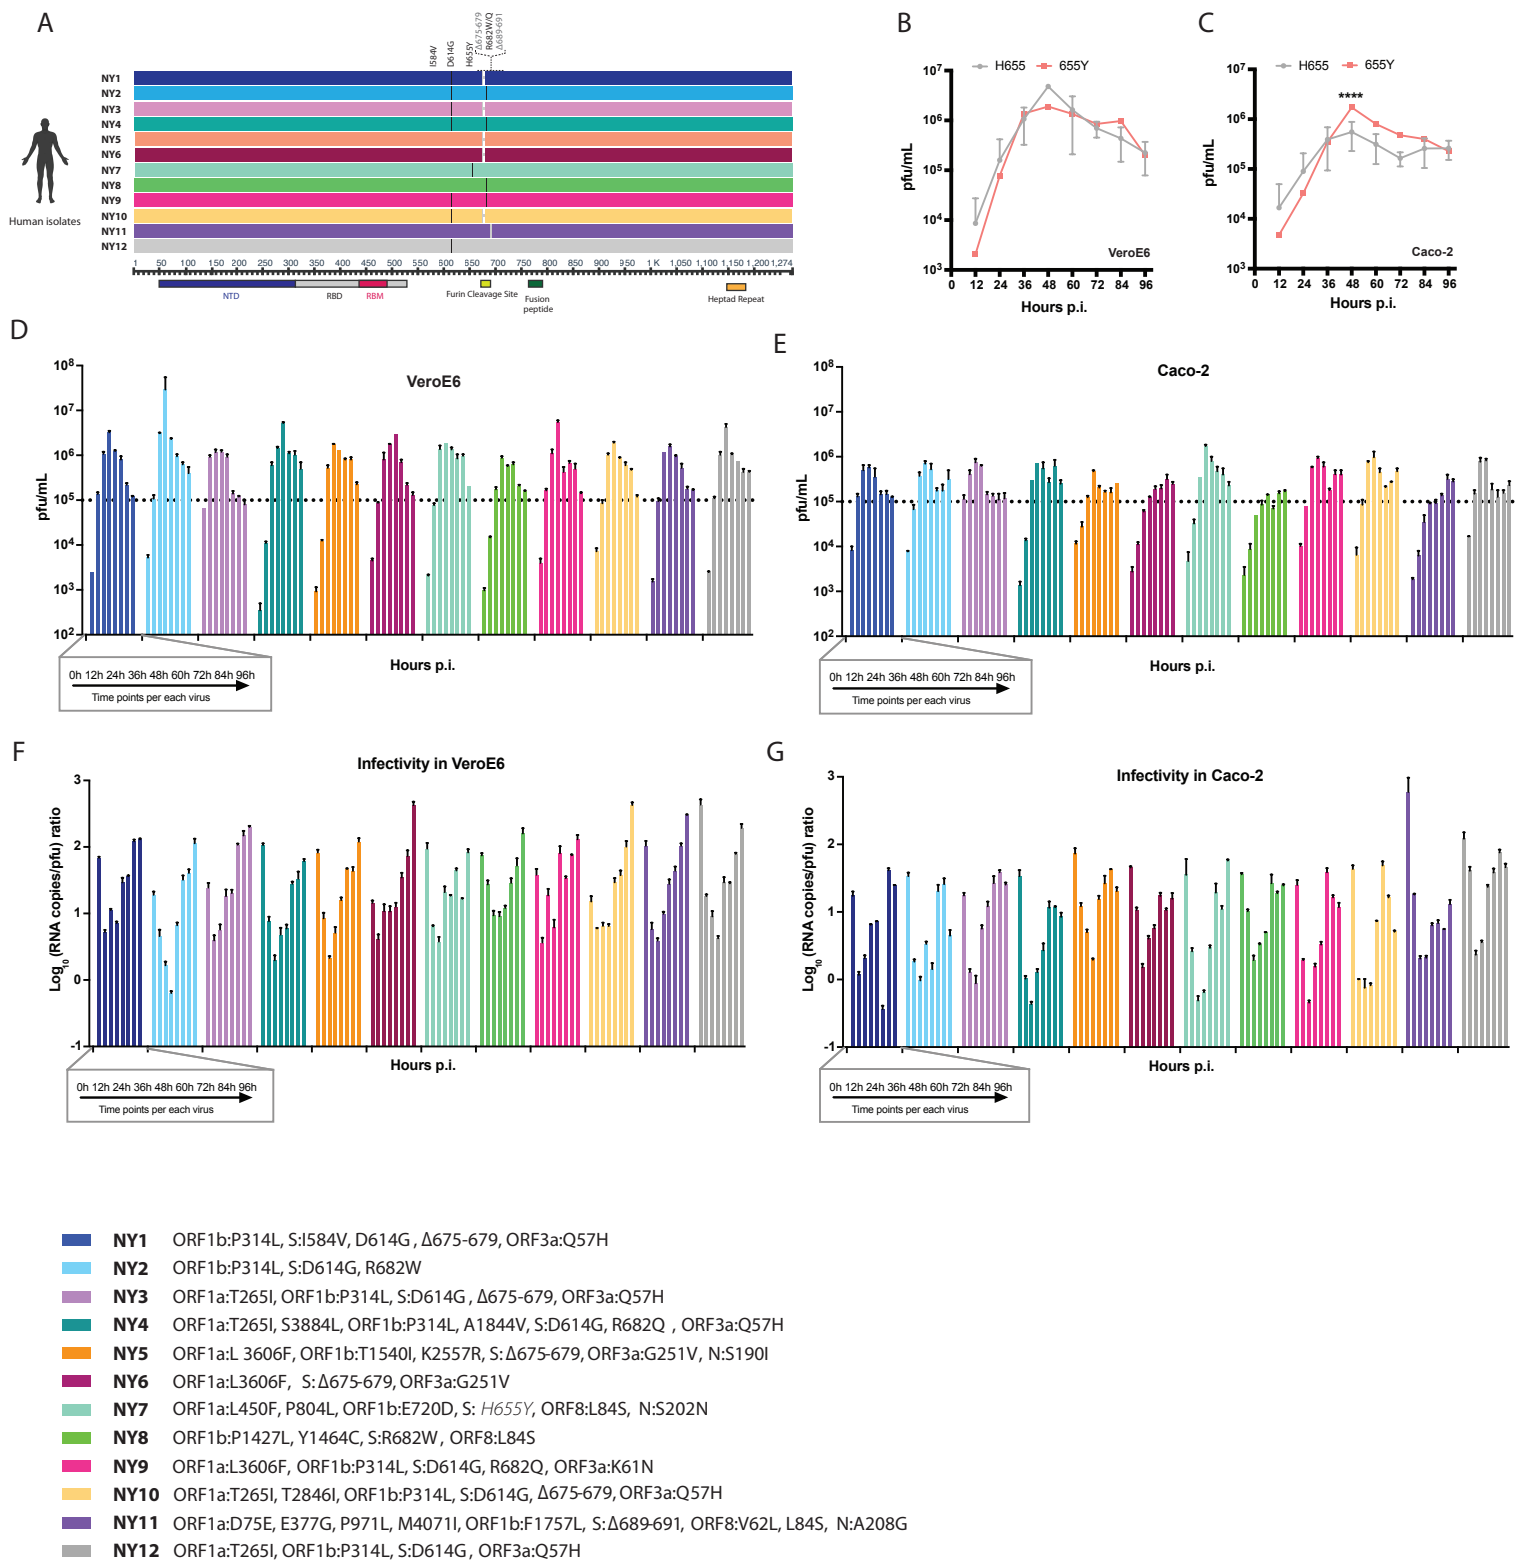

**Supplementary Figure 2 related to Figure 1 and Figure 2. Spike polymorphism H655Y identified in SARS-CoV-2 NY7 confers a growth advantage in human Caco-2 cells. A)** Multiple sequence alignment of the S protein from SARS-CoV-2 viruses isolated from nasal swabs collected during the first pandemic wave in NY. Diagram shows the corresponding S amino acid substitutions mapped to the S gene. **B-C)** Viral growth of the NY7 containing the 655Y (red) versus its ancestors 655H (grey) in VeroE6 and Caco-2 cells. Cells were infected at an MOI of 0.01 and supernatants were titrated in duplicates at the indicated hours post-infection (p.i.) and expressed as plaque forming units per milliliter (PFU). Means and SD are shown for the NY isolates containing 655H. Two-way ANOVA with Holm-Šidák posttest was used for multiple comparisons. Statistical significance was considered when  $p \leq 0.05$  (\*\*\*\*,  $p < 0.0001$ ). Replication kinetics of 12 NY human isolates in **D)** VeroE6 and **E)** Caco-2 cells. Cells were infected at a multiplicity of infection (MOI) of 0.01. Viral titers were determined by plaque assay and expressed as PFU per milliliter at the indicated hours post-infection (p.i.). Means and range are shown from two independent experiments. Virion infectivity expressed as genomic RNA/pfu ratio in **F)** VeroE6 and **G)** Caco-2 cells. Cells were infected at a MOI of 0.01. The genomic viral RNA was determined by RT-qPCR. Means and range are shown from two independent experiments.

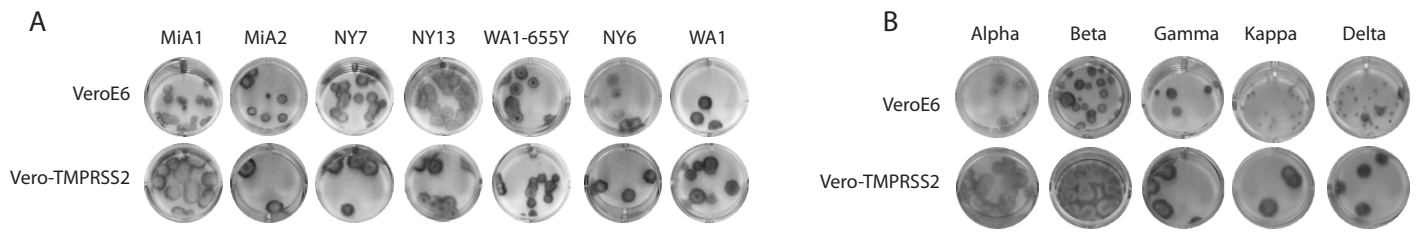

**Supplementary Figure 3 related to Figure 2 and Figure 6. Plaque phenotype of A) early SARS-CoV-2 isolates and B) VOCs according to TMPRSS2 expression in Vero cells. The same viral supernatant was used to infect Vero and Vero-TMPRSS2 cells. Plaques were developed by immunostaining.**

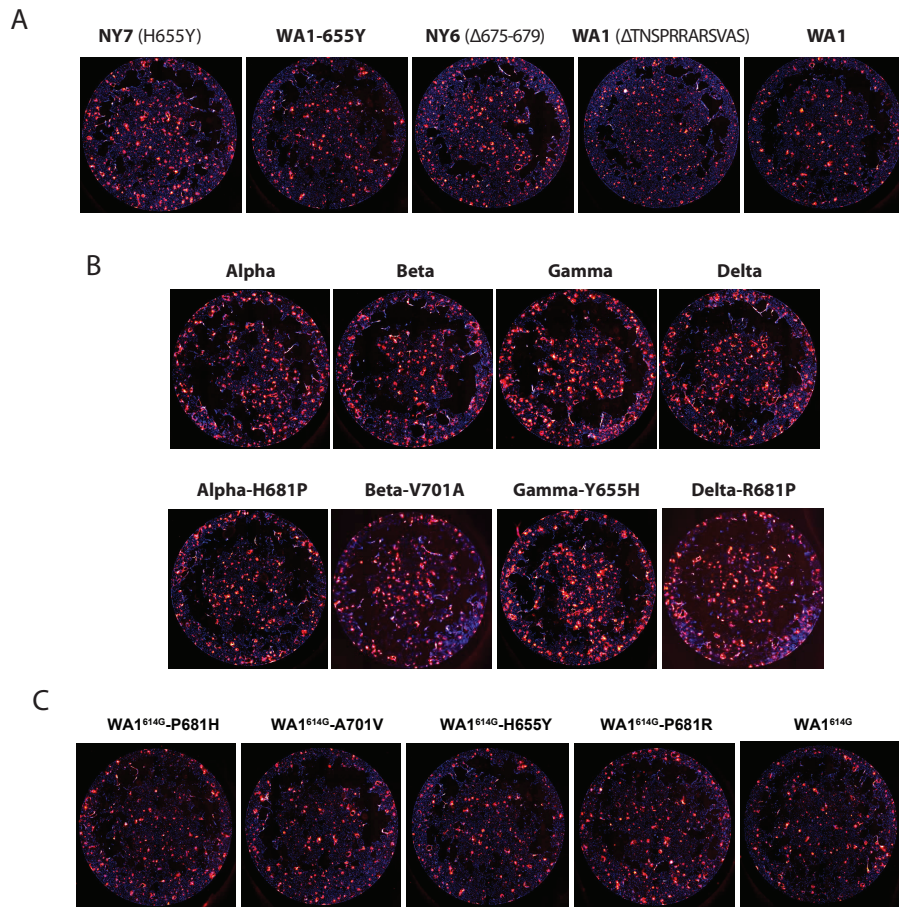

**Supplementary Figure 4 related to Figure 3 and Figure 7. Spike expression levels of SARS-CoV-2 isolates in split-GFP fusion assay.** Vero-TMPRSS2 cells were transfected with Spike plasmids from **A)** the early SARS-CoV-2 isolates, **B)** VOCs and reverse mutants and **C)** gain of function mutants in WA1-D614G backbone. Cells were stained against Spike protein and DAPI was used to visualize the nucleus. Images of the whole wells were obtained and analyzed using the Celigo Image Cytometer (Nexcelom).

**Supplementary Table 1 related to Methods and Figure 1.** GISAID accession numbers of human SARS-CoV-2 variants isolated from New York (NY) during the first COVID-19 pandemic outbreak.

| <b>SARS-CoV-2 isolate</b> | <b>GISAID accession number</b>           |
|---------------------------|------------------------------------------|
| NY1                       | HCOV19/NY/PV08139/2020_EPI_ISL_MSPV08139 |
| NY2                       | HCOV19/NY/PV08426/2020_EPI_ISL_MSPV08426 |
| NY3                       | HCOV19/NY/PV08428/2020_EPI_ISL_MSPV08428 |
| NY4                       | HCOV19/NY/PV08485/2020_EPI_ISL_MSPV08485 |
| NY5                       | HCOV19/NY/PV08137/2020_EPI_ISL_MSPV08137 |
| NY6                       | HCOV19/NY/PV08489/2020_EPI_ISL_MSPV08489 |
| NY7                       | HCOV19/NY/PV08148/2020_EPI_ISL_MSPV08148 |
| NY8                       | HCOV19/NY/PV08146/2020_EPI_ISL_MSPV08146 |
| NY9                       | HCOV19/NY/PV08462/2020_EPI_ISL_MSPV08462 |
| NY10                      | HCOV19/NY/PV08468/2020_EPI_ISL_MSPV08468 |
| NY11                      | HCOV19/NY/PV08490/2020_EPI_ISL_MSPV08490 |
| NY12                      | HCOV19/NY/PV08495/2020_EPI_ISL_MSPV08495 |

**Supplementary Table 2 related to Figure 1 and Figure 2.** Genomic mutations of mink-derived SARS-CoV-2 isolates (MiA) and human SARS-CoV-2 circulating variants during the first pandemic outbreak in New York (NY).

| SARS-CoV-2 isolate | Mutations                                                                            |
|--------------------|--------------------------------------------------------------------------------------|
| MiA-1              | ORF1a:S692P, S:T259K, <u>H655Y</u> , H1159Y, ORF8:L84S                               |
| MiA-2              | S:T259K, <u>H655Y</u> , H1159Y, ORF8:L84S                                            |
| MiA-3              | S:T259K, <u>H655Y</u> , ORF6:F22*, ΔK23, ORF8:L84S                                   |
| MiA-4              | S: <u>H655Y</u> , R682W, ORF8:L84S                                                   |
| MiA-5              | ORF1a:L3606F, S: <u>H655Y</u> , R682W, ORF8:L84S                                     |
| MiA-6              | S: <u>H655Y</u> , R682W, ORF8:L84S                                                   |
| NY1                | ORF1b:P314L, S:I584V, D614G, Δ675-679, ORF3a:Q57H                                    |
| NY2                | ORF1b:P314L, S:D614G, R682W                                                          |
| NY3                | ORF1a:T265I, ORF1b:P314L, S:D614G, Δ675-679, ORF3a:Q57H                              |
| NY4                | ORF1a:T265I, S3884L, ORF1b:P314L, A1844V, S:D614G, R682Q, ORF3a:Q57H                 |
| NY5                | ORF1a:L3606F, ORF1b:T1540I, K2557R, S:Δ675-679, ORF3a:G251V, N:S190I                 |
| NY6                | ORF1a:L3606F, S:Δ675-679, ORF3a:G251V                                                |
| NY7                | ORF1a:L450F, P804L, ORF1b:E720D, S: <u>H655Y</u> , ORF8:L84S, N:S202N                |
| NY8                | ORF1b:P1427L, Y1464C, S:R682W, ORF8:L84S                                             |
| NY9                | ORF1a:L3606F, ORF1b:P314L, S:D614G, R682Q, ORF3a:K61N                                |
| NY10               | ORF1a:T265I, T2846I, ORF1b:P314L, S:D614G, Δ675-679, ORF3a:Q57H                      |
| NY11               | ORF1a:D75E, E377G, P971L, M4071I, ORF1b:F1757L, S:Δ689-691, ORF8:V62L, L84S, N:A208G |
| NY12               | ORF1a:T265I, ORF1b:P314L, S:D614G, ORF3a:Q57H                                        |

**Supplementary Table 3 related to Methods.** Primers used to detect SARS-CoV-2 RNA in nasopharyngeal swabs from COVID-19 infected patients.

| <b>Primer</b>               | <b>Nucleotide sequence 5'&gt;3'</b> |
|-----------------------------|-------------------------------------|
| 2019-nCoV_N1 Forward Primer | GAC CCC AAA ATC AGC GAA AT          |
| 2019-nCoV_N1 Reverse Primer | TCT GGT TAC TGC CAG TTG AAT CTG     |
| 2019-nCoV_N2 Forward Primer | TTA CAA ACA TTG GCC GCA AA          |
| 2019-nCoV_N2 Reverse Primer | GCG CGA CAT TCC GAA GAA             |

**Supplementary Table 4 related to Figure 2.** Multiple comparison analysis of the viral growth of the panel of 655Y viruses used in this study.

|                              | <b>Tukey's multiple comparisons test</b> | <b>Mean Diff.</b> | <b>95.00% CI of diff.</b> | <b>Summary</b> | <b>Adjusted P Value</b> |
|------------------------------|------------------------------------------|-------------------|---------------------------|----------------|-------------------------|
| <b>VeroE6 24h p.i.</b>       | MiA1 vs. NY13                            | 1133333           | 37431 to 2229235          | *              | 0.0406                  |
|                              | MiA1 vs. WA1 wt                          | 1275000           | 179098 to 2370902         | *              | 0.0182                  |
|                              | MiA2 vs. WA1 wt                          | 1208333           | 112431 to 2304235         | *              | 0.0266                  |
|                              | WA1-655Y vs. WA1 wt                      | 1175000           | 79098 to 2270902          | *              | 0.0321                  |
| <b>Vero-TMPRSS2 24h p.i.</b> | MiA2 vs. WA1 wt                          | 3958333           | 104340 to 7812326         | *              | 0.0424                  |
| <b>Vero-TMPRSS2 48h p.i.</b> | MiA1 vs. WA1-655Y                        | -6016667          | -11530583 to -502750      | *              | 0.0286                  |
|                              | MiA2 vs. WA1-655Y                        | -6316667          | -11830583 to -802750      | *              | 0.0204                  |
| <b>Pneumocytes 24h p.i.</b>  | NY7 vs. NY13                             | -46667            | -68524 to -24809          | ***            | 0.0003                  |
|                              | NY7 vs. WA1-655Y                         | -26667            | -48524 to -4809           | *              | 0.0163                  |
|                              | NY7 vs. NY6                              | -48333            | -70191 to -26476          | ***            | 0.0002                  |
|                              | NY13 vs. WA1 wt                          | 55583             | 33726 to 77441            | ****           | <0.0001                 |
|                              | WA1-655Y vs. WA1 wt                      | 35583             | 13726 to 57441            | **             | 0.0023                  |
|                              | NY6 vs. WA1 wt                           | 57250             | 35393 to 79107            | ****           | <0.0001                 |



**Supplementary Table 5 related to Figure 6.** Multiple comparison analysis of the viral growth of the VOCs used in this study.

|                              | <b>Tukey's multiple comparisons test</b> | <b>Mean Diff.</b> | <b>95.00% CI of diff.</b> | <b>Summary</b> | <b>Adjusted P Value</b> |
|------------------------------|------------------------------------------|-------------------|---------------------------|----------------|-------------------------|
| <b>VeroE6 24h p.i.</b>       | Alpha vs. Beta                           | -1368333          | -1735453 to -1001213      | ****           | <0.0001                 |
|                              | Beta vs. Gamma                           | 1296667           | 929547 to 1663787         | ****           | <0.0001                 |
|                              | Beta vs. Kappa                           | 1431450           | 1064330 to 1798570        | ****           | <0.0001                 |
|                              | Beta vs. Delta                           | 1412167           | 1045047 to 1779287        | ****           | <0.0001                 |
| <b>VeroE6 48h p.i.</b>       | Alpha vs. Kappa                          | 4225000           | 529473 to 7920527         | *              | 0.0241                  |
|                              | Beta vs. Gamma                           | 5033333           | 1337806 to 8728860        | **             | 0.0081                  |
|                              | Beta vs. Kappa                           | 6725000           | 3029473 to 10420527       | ***            | 0.001                   |
|                              | Beta vs. Delta                           | 5400000           | 1704473 to 9095527        | **             | 0.005                   |
| <b>Vero-TMPRSS2 24h p.i.</b> | Alpha vs. Beta                           | -1603333          | -2297761 to -908905       | ***            | 0.0001                  |
|                              | Alpha vs. Gamma                          | -970000           | -1664428 to -275572       | **             | 0.0068                  |
|                              | Beta vs. Kappa                           | 1610000           | 915572 to 2304428         | ***            | 0.0001                  |
|                              | Beta vs. Delta                           | 1640000           | 945572 to 2334428         | ***            | 0.0001                  |
|                              | Gamma vs. Kappa                          | 976667            | 282239 to 1671095         | **             | 0.0065                  |
|                              | Gamma vs. Delta                          | 1006667           | 312239 to 1701095         | **             | 0.0053                  |
| <b>Vero-TMPRSS2 48h p.i.</b> | Beta vs. Gamma                           | -2433333          | -4478858 to -387808       | *              | 0.019                   |
|                              | Gamma vs. Kappa                          | 3386667           | 1341142 to 5432192        | **             | 0.002                   |
|                              | Gamma vs. Delta                          | 3405000           | 1359475 to 5450525        | **             | 0.0019                  |
| <b>Pneumocytes 24h p.i.</b>  | Alpha vs. Beta                           | -138333           | -162234 to -114433        | ****           | <0.0001                 |
|                              | Alpha vs. Gamma                          | -35000            | -58901 to -11099          | **             | 0.0049                  |
|                              | Alpha vs. Kappa                          | 55450             | 31549 to 79351            | ***            | 0.0001                  |
|                              | Alpha vs. Delta                          | 53383             | 29483 to 77284            | ***            | 0.0002                  |
|                              | Beta vs. Gamma                           | 103333            | 79433 to 127234           | ****           | <0.0001                 |
|                              | Beta vs. Kappa                           | 193783            | 169883 to 217684          | ****           | <0.0001                 |
|                              | Beta vs. Delta                           | 191717            | 167816 to 215617          | ****           | <0.0001                 |
|                              | Gamma vs. Kappa                          | 90450             | 66549 to 114351           | ****           | <0.0001                 |
|                              | Gamma vs. Delta                          | 88383             | 64483 to 112284           | ****           | <0.0001                 |
| <b>Pneumocytes 48h p.i.</b>  | Beta vs. Kappa                           | 3953333           | 635648 to 7271019         | *              | 0.0188                  |
|                              | Beta vs. Delta                           | 3961667           | 643981 to 7279352         | *              | 0.0186                  |

**Supplementary Table 6 related to Figure 4.** Relative abundance of S:655Y on the viral RNA present in the input, nasal washes, lungs, and nasal turbinates of the hamsters analyzed by next-generation sequencing.

| Input       |          |                  | 56% 655H: 44% 655Y      |
|-------------|----------|------------------|-------------------------|
| Sample      | Day p.i. | Tissue           | % of 655Y               |
| H# Cage 1 ● | 2        | Nasal washes     | 98%                     |
| H# Cage 1   | 2        | Nasal washes     | 100%                    |
| H# Cage 2 ● | 2        | Nasal washes     | 100%                    |
| H# Cage 2   | 2        | Nasal washes     | 99%                     |
| H# Cage 3 ● | 2        | Nasal washes     | 99%                     |
| H# Cage 3   | 2        | Nasal washes     | 100%                    |
| H# Cage 4 ● | 2        | Nasal washes     | 99%                     |
| H# Cage 4   | 2        | Nasal washes     | 32%                     |
| H# Cage 5 ● | 2        | Nasal washes     | 99%                     |
| H# Cage 5   | 2        | Nasal washes     | 99%                     |
| H# Cage 1 ● | 4        | Nasal washes     | 100%                    |
| H# Cage 1   | 4        | Nasal washes     | 100%                    |
| H# Cage 2 ● | 4        | Nasal washes     | <b>Dead</b>             |
| H# Cage 2   | 4        | Nasal washes     | 99% T                   |
| H# Cage 3 ● | 4        | Nasal washes     | 99%                     |
| H# Cage 3   | 4        | Nasal washes     | 100%                    |
| H# Cage 4 ● | 4        | Nasal washes     | 98%                     |
| H# Cage 4   | 4        | Nasal washes     | 29%                     |
| H# Cage 5 ● | 4        | Nasal washes     | 98%                     |
| H# Cage 5   | 4        | Nasal washes     | 100%                    |
| H# Cage 1   | 6        | Nasal washes     | 100%                    |
| H# Cage 2   | 6        | Nasal washes     | 99%                     |
| H# Cage 3   | 6        | Nasal washes     | 100%                    |
| H# Cage 4   | 6        | Nasal washes     | 15%                     |
| H# Cage 5   | 6        | Nasal washes     | 100%                    |
| H# Cage 1 ● | 5        | Lungs            | 99%                     |
| H# Cage 1   | 7        | Lungs            | 83%                     |
| H# Cage 2 ● | 5        | Lungs            | <b>Dead</b>             |
| H# Cage 2   | 7        | Lungs            | <b>No amplification</b> |
| H# Cage 3 ● | 5        | Lungs            | 97%                     |
| H# Cage 3   | 7        | Lungs            | 100%                    |
| H# Cage 4 ● | 5        | Lungs            | 98%                     |
| H# Cage 4   | 7        | Lungs            | 39%                     |
| H# Cage 5 ● | 5        | Lungs            | <b>No amplification</b> |
| H# Cage 5   | 7        | Lungs            | 99%                     |
| H# Cage 1 ● | 5        | Nasal turbinates | 100%                    |
| H# Cage 1   | 7        | Nasal turbinates | <b>No amplification</b> |
| H# Cage 2 ● | 5        | Nasal turbinates | <b>Dead</b>             |
| H# Cage 2   | 7        | Nasal turbinates | 98%                     |
| H# Cage 3 ● | 5        | Nasal turbinates | <b>No amplification</b> |
| H# Cage 3   | 7        | Nasal turbinates | 100%                    |
| H# Cage 4 ● | 5        | Nasal turbinates | 100%                    |
| H# Cage 4   | 7        | Nasal turbinates | 52%                     |
| H# Cage 5 ● | 5        | Nasal turbinates | 100%                    |
| H# Cage 5   | 7        | Nasal turbinates | 100%                    |

● indicates Direct Infected (DI) animal
